# Supplementary material for: New Benthic Cyanobacteria from Guadeloupe Mangroves as Producers of Antimicrobials
Source: MDPI journal article supplement (doi:10.3390/md18010016), 2019-12-23
Supplement: s1 [file s1]

**Wewakamide A**  
 PMC 1057.18, PMC 1069.18,  
 PMC 1050.18, PMC 1052.18  
 (*Arthrospira* sp., *Oscillatoria* sp.,  
*Scytonema* sp., *New genus 3*)

**Anacyclamide A10**  
 PMC 1092.19 (*Lyngbya* sp.)

**Wewakazole**  
 PMC 1092.19  
 (*Lyngbya* sp.)

**Nostophycin**  
 PMC 1092.19 (*Lyngbya* sp.)

**Raocyclamide B**  
 PMC 1056.18, PMC 1057.18  
 (*Arthrospira* sp.)

**Aerucyclamide C**  
 PMC 1092.19 (*Lyngbya* sp.)

**Microcystin LR**  
 PMC 1092.19 (*Lyngbya* sp.)

**Viequeamide A**  
 PMC 1050.18, PMC 1052.18,  
 PMC 1069.18, PMC 1057.18  
 (*Oscillatoria* sp., *New genus 3*,  
*Scytonema* sp., *Arthrospira* sp.)

**Pitipeptolide A**  
 PMC 1050.18, PMC 1069.18, PMC 1057.18  
 (*Oscillatoria* sp., *Scytonema* sp., *Arthrospira* sp.)

**Majusculamide C Demethoxy**  
 PMC 1050.18, PMC 1069.18, PMC 1057.18  
 PMC 1075.18  
 (*Oscillatoria* sp., *Scytonema* sp., *Arthrospira* sp.)
