# Supplementary material for: New Benthic Cyanobacteria from Guadeloupe Mangroves as Producers of Antimicrobials
Source: MDPI journal article supplement (doi:10.3390/md18010016), 2019-12-23

# Taxonomical mapping

- *Jaaginema* sp.
- *Arthrospira* sp.
- *Oscillatoria* spp.
- *New genus 1*
- *Lyngbya* sp.
- *Limnothrix* sp.
- *Scytonema* sp.
- *Nodosilinea* sp.
- *New genus 2*
- *New genus 3*

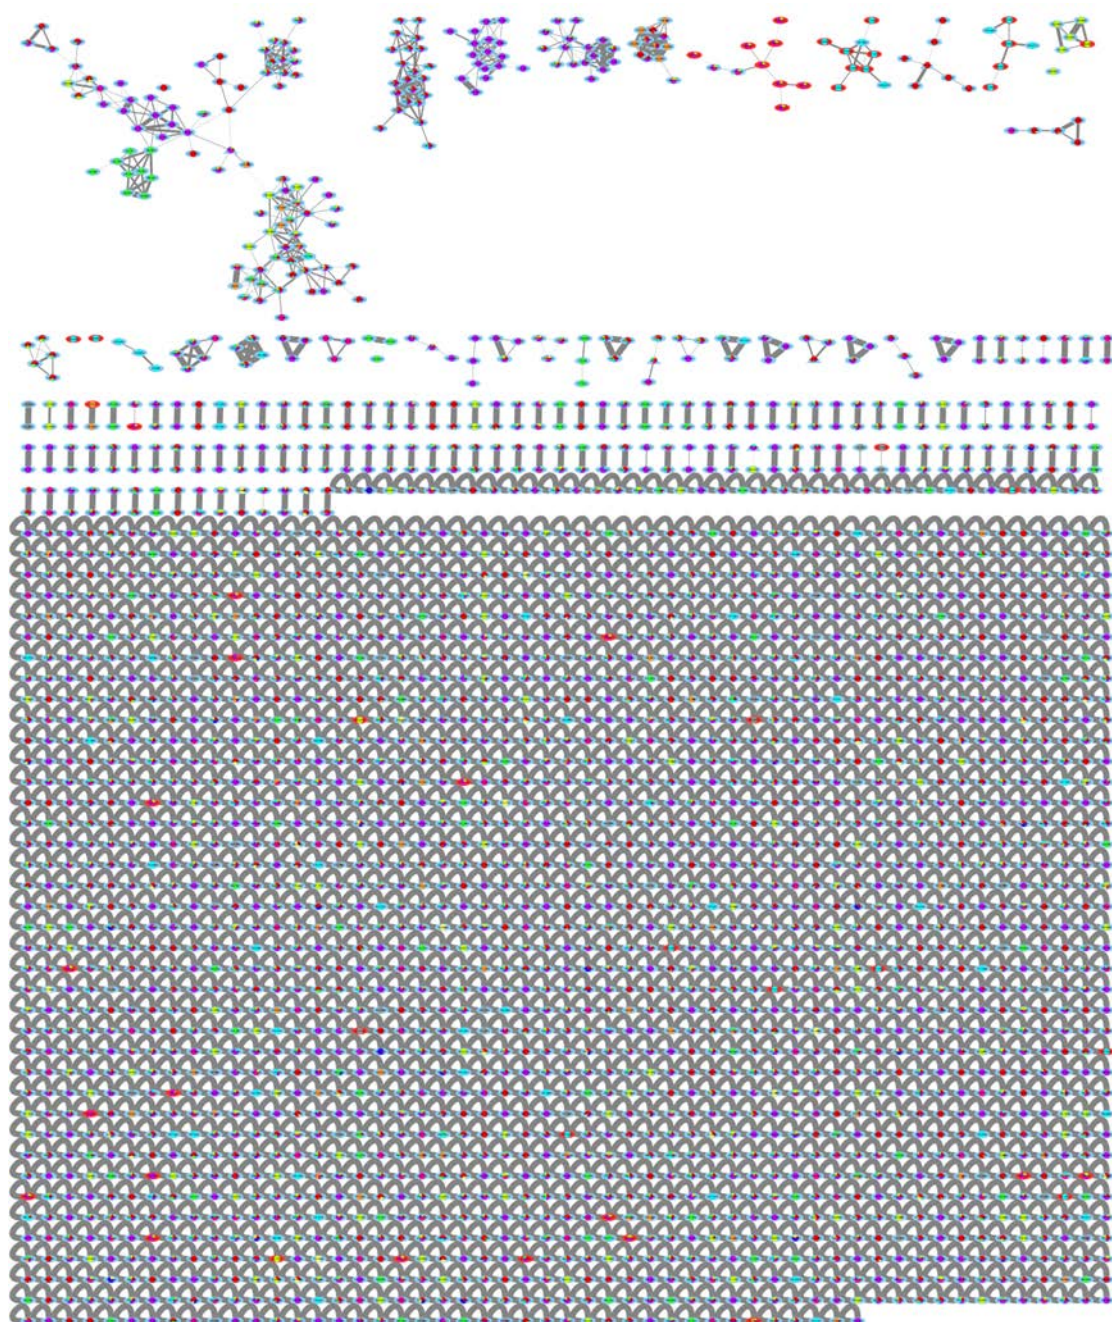

Supplement: s1 [file s1]
