# Supplementary material for: New Benthic Cyanobacteria from Guadeloupe Mangroves as Producers of Antimicrobials
Source: MDPI journal article supplement (doi:10.3390/md18010016), 2019-12-23
Supplement: s1 [file s1]

# Supplementary Materials: New Benthic Cyanobacteria from Guadeloupe Mangroves as Producers of Antimicrobials

Sébastien Duperron,<sup>1,2,\*</sup> Mehdi A. Beniddir<sup>3</sup>, Sylvain Durand<sup>1</sup>, Arlette Longeon<sup>1</sup>, Charlotte Duval<sup>1</sup>, Olivier Gros<sup>4</sup>, Cécile Bernard<sup>1</sup> and Marie-Lise Bourguet-Kondracki<sup>1,\*</sup>

<sup>1</sup> Molécules de Communication et Adaptation des Microorganismes, UMR 7245 CNRS, Muséum National d'Histoire Naturelle, 57 rue Cuvier (CP54), 75005 Paris, France; sylvain.durand@orange.fr (S.D.); arlette.longeon@mnhn.fr (A.L.); charlotte.duval@mnhn.fr (C.D.); cecile.bernard@mnhn.fr (C.B.)

<sup>2</sup> Institut Universitaire de France, 75005 Paris, France.

<sup>3</sup> Équipe "Pharmacognosie-Chimie des Substances Naturelles" BioCIS, CNRS, Université Paris-Saclay 5 rue Jean-Baptiste Clément, 92290 Châtenay-Malabry, France; mehdi.beniddir@u-psud.fr

<sup>4</sup> UMR 7205 ISYEB et Université des Antilles, Pointe à Pitre, 97157 Guadeloupe, France; olivier.gros@univ-antilles.fr

\* Correspondence: sebastien.duperron@mnhn.fr (S.D.); marie-lise.bourguet@mnhn.fr (M.-L.B.-K)

**Table S1:** Pairwise distance values among new cyanobacterial strains isolated during this study. Values below 20 0.05 (5% divergence, as congeners) are in bold.

**Table S2.** List of the 54 candidate structures, which are consistent with previously identified peptides using DEREPLICATOR algorithm.

**Figure S1.** Global molecular network obtained from LC-MS/MS data of 20 cyanobacteria extracts (red ellipses are DEREPLICATOR peptide matches).

**Figure S2.** A selection of clusters and self-loops annotated with putative cyanobacterial peptides and their origin.
