# Supplementary material for: New Benthic Cyanobacteria from Guadeloupe Mangroves as Producers of Antimicrobials
Source: MDPI journal article supplement (doi:10.3390/md18010016), 2019-12-23
Supplement: s1 [file s1]

**Table S2.** List of 54 candidate structures, which are consistent with previously identified peptides using DEREPLICATOR algorithm.

| Compound         | Producer                          | Phylum                | Activity      | Ref | Found in strain PMC*                     | Score | P-value              | PepMass | SpecMass |
|------------------|-----------------------------------|-----------------------|---------------|-----|------------------------------------------|-------|----------------------|---------|----------|
| Stylissamide C   | <i>Stylissa caribica</i>          | Porifera              |               | 1   | 1069, 1070, 1050, 1052, 1057             | 14    | $6.5 \cdot 10^{-20}$ | 861.44  | 829.49   |
| Sanguinamide_A   | <i>Hexabranhus sanguineus</i>     | Mollusca (Nudibranch) |               | 2   | 1069, 1070, 1050, 1052, 1057             | 13    | $1.0 \cdot 10^{-17}$ | 721.36  | 767.48   |
| E'Champacyclin'  | <i>Streptomyces</i> C42           | Bacteria              | Antibacterial | 3   | 1069, 1070, 1050, 1052, 1057             | 13    | $4.4 \cdot 10^{-17}$ | 897.61  | 910.57   |
| B_12489_B_12489C | Unknown                           |                       |               | -   | 1092                                     | 15    | $5.7 \cdot 10^{-18}$ | 1114.64 | 989.57   |
| Gramicidin S2    | <i>Aneurinibacillus migulanus</i> | Bacteria              | Antibacterial | 4   | 1050, 1074, 1066, 1080, 1056, 1069, 1057 | 13    | $1.1 \cdot 10^{-15}$ | 1126.69 | 1098.63  |
| Viequeamide A    | <i>Rivularia</i> sp               | Cyanobacteria         | Cytotoxic     | 5   | 1050, 1052, 1069,                        | 12    | $2.8 \cdot 10^{-17}$ | 803.50  | 892.55   |

|                              |                                                      |               |           |    |                                                            |    |                      |         |         |
|------------------------------|------------------------------------------------------|---------------|-----------|----|------------------------------------------------------------|----|----------------------|---------|---------|
|                              |                                                      |               |           |    | 1057                                                       |    |                      |         |         |
| Dominicin                    | <i>Eurypon laughlini</i>                             | Porifera      |           | 6  | 1052,<br>1050,<br>1069,<br>1057                            | 12 | $2.1 \cdot 10^{-15}$ | 844.54  | 901.57  |
| Wewakamide A                 | <i>Lyngbya semiplena</i><br><i>Lyngbya majuscula</i> | Cyanobacteria | Cytotoxic | 7  | 1057,<br>1069,<br>1050,<br>1052,                           | 12 | $4.4 \cdot 10^{-15}$ | 994.65  | 891.59  |
| Wewakazole                   | <i>Lyngbya majuscula</i>                             | Cyanobacteria |           | 8  | 1092,<br>1056                                              | 12 | $6.7 \cdot 10^{-12}$ | 1140.54 | 1058.54 |
| Nostophycin                  | <i>Nostoc</i> 152                                    | Cyanobacteria | Cytotoxic | 9  | 1092                                                       | 11 | $2.1 \cdot 10^{-15}$ | 888.48  | 943.55  |
| Phakellistatin 2             | <i>Phakellia carteri</i>                             | Porifera      | Cytotoxic | 10 | 1052,<br>1050,<br>1064,<br>1056,<br>1069,<br>1057,<br>1068 | 11 | $1.2 \cdot 10^{-14}$ | 827.46  | 811.50  |
| Rolloamide A                 | <i>Eurypon laughlini</i>                             | Porifera      | Cytotoxic | 11 | 1057,<br>1069,<br>1056,<br>1080,<br>1064,<br>1051,<br>1050 | 11 | $1.5 \cdot 10^{-14}$ | 763.46  | 795.47  |
| Majusculamide<br>C_Demethoxy | <i>Lyngbya majuscula</i>                             | Cyanobacteria | Cytotoxic | 12 | 1057,<br>1069,<br>1050,<br>1075                            | 11 | $4.6 \cdot 10^{-13}$ | 954.58  | 892.49  |
| Callyaerin H                 | <i>Callyspongia</i><br><i>aerizusa</i>               | Porifera      | Cytotoxic | 13 | 1070,<br>1052,<br>1050,<br>1069,<br>1057                   | 10 | $1.8 \cdot 10^{-13}$ | 1043.62 | 938.57  |
| Hymenamide B                 | <i>Hymeniacidon</i>                                  | Porifera      |           | 14 | 1092                                                       | 10 | $4.0 \cdot 10^{-13}$ | 830.40  | 830.39  |

|                                          |                                                                                 |                       |                         |     |                                  |    |                       |         |         |
|------------------------------------------|---------------------------------------------------------------------------------|-----------------------|-------------------------|-----|----------------------------------|----|-----------------------|---------|---------|
| Haliclona B                              | Marine sponges                                                                  | Porifera              |                         | 15  | 1092                             | 10 | $5.4 \times 10^{-12}$ | 788.39  | 846.40  |
| Empedopeptin                             | <i>Empedobacter haloabium</i> nov. sp. (ATCC 31962).                            | Bacteria              | Antibacterial           | 16  | 1092                             | 10 | $7.5 \times 10^{-12}$ | 1125.56 | 1051.51 |
| Anacyclamide A10                         | <i>Anabaena</i> sp. 90                                                          | Cyanobacteria         | Cytotoxic               | 17  | 1092                             | 10 | $9.6 \times 10^{-11}$ | 1052.53 | 1009.49 |
| Micropeptin_SD944                        | <i>Microcystis aeruginosa</i>                                                   | Cyanobacteria         |                         | 18- | 1092                             | 9  | $1.4 \times 10^{-14}$ | 944.52  | 929.53  |
| Destruixins 2-Valine analogue5'-hydroxy, | <i>Beauveria felina</i>                                                         | Fungus                | Insecticid<br>Cytotoxic | 19  | 1057                             | 9  | $1.6 \times 10^{-11}$ | 595.36  | 593.29  |
| Cycloamanide_D                           | <i>Amanita phalloides</i>                                                       | Fungus                | Immunosuppressive       | 20  | 1052,<br>1050,<br>1069,<br>1057, | 9  | $1.5 \times 10^{-10}$ | 884.48  | 857.49  |
| Myriastramide_A                          | <i>Myriastria clavosa</i>                                                       | Porifera              |                         | 21  | 1052,<br>1050,<br>1069,<br>1057  | 9  | $1.6 \times 10^{-10}$ | 854.43  | 839.50  |
| Myriastramide_A_?3''-Isomer,_2''?-chloro | Unknown                                                                         |                       |                         | -   | 1092                             | 9  | $1.6 \times 10^{-10}$ | 888.39  | 846.38  |
| Aureobasidin N                           | <i>Aureobasidium pullulans</i>                                                  | Marine-Derived Fungus | Antifungal              | 22  | 1092                             | 9  | $4.2 \times 10^{-10}$ | 1082.68 | 975.55  |
| Sanguinamide B                           | <i>Hexabanchus sanguineus</i>                                                   | Mollusca (Nudibranch) |                         | 2   | 1092                             | 9  | $1.1 \times 10^{-9}$  | 710.27  | 677.22  |
| Deoxy Mozamide B                         | <i>Theonella</i> sp.                                                            | Porifera              |                         | 23  | 1071                             | 8  | $6.7 \times 10^{-12}$ | 844.49  | 832.52  |
| Stylissamide E                           | <i>Stylissa caribica</i>                                                        | Porifera              |                         | 24  | 1092                             | 8  | $6.5 \times 10^{-11}$ | 782.43  | 681.30  |
| Ceratospongamide                         | Red alga <i>Ceratodictyon spongiosum</i> & symbiotic sponge <i>Sigmatocia</i> . | Algae and Porifera    |                         | 25  | 1069,<br>1057,<br>1050           | 8  | $8.3 \times 10^{-11}$ | 767.35  | 799.44  |
| Xentrivalpeptide P                       | <i>Xenorhabdus</i> sp.                                                          | Bacteria              |                         | 26  | 1050,                            | 8  | $9.8 \times 10^{-11}$ | 797.47  | 782.48  |

|                                                  |                                                    |                        |                             |     |                                                                     |   |                      |         |         |
|--------------------------------------------------|----------------------------------------------------|------------------------|-----------------------------|-----|---------------------------------------------------------------------|---|----------------------|---------|---------|
|                                                  |                                                    |                        |                             |     | 1069,<br>1057                                                       |   |                      |         |         |
| Lissoclinamide 1                                 | <i>Lissoclinum patella</i>                         | Chordata<br>(Ascidian) | Cytotoxic                   | 27  | 1076,<br>1071,<br>1052,<br>1050,<br>1069,<br>1057,<br>1068          | 8 | $4.9 \cdot 10^{-10}$ | 705.28  | 659.39  |
| Kulokekahilide 1                                 | <i>Cephalaspidean mollusc Philinopsis speciosa</i> | Mollusca               | Cytotoxic                   | 28  | 1092                                                                | 8 | $7.1 \cdot 10^{-10}$ | 954.55  | 1069.53 |
| Iturin A_Iturin A3                               | <i>Bacillus subtilis</i>                           | Bacteria               | Antibacterial               | 29  | 1092                                                                | 8 | $8.7 \cdot 10^{-10}$ | 1056.56 | 1041.52 |
| Iturin A_Iturin A2                               | <i>Bacillus subtilis</i>                           | Bacteria               | Antibacterial               | 29  | 1092                                                                | 8 | $1.0 \cdot 10^{-9}$  | 1042.54 | 1023.50 |
| Haliclonamide_B_O-(2-Hydroxy-3-methyl-3-butenyl) | <i>Haliclona</i> sp                                | Porifera               |                             | 30- | 1092                                                                | 8 | $1.6 \cdot 10^{-9}$  | 872.44  | 947.54  |
| Citrusin VIII                                    | <i>Citrus medica</i>                               | Plant,<br>fruit peel   |                             | 31  | 1070,<br>1069                                                       | 8 | $5.9 \cdot 10^{-9}$  | 821.48  | 782.41  |
| Pteratide III                                    | <i>Basidiomycete Pterula</i>                       | Fungus                 | Cytotoxic                   | 32  | 1070,<br>1052,<br>1050,<br>1074,<br>1080,<br>1069,<br>1057,<br>1072 | 7 | $5.9 \cdot 10^{-10}$ | 818.49  | 812.49  |
| Vioprolide C                                     | <i>Myxobacterium Cystobacter violaceus</i>         | Bacteria               | Antifungal<br>Antibacterial | 33  | 1071,<br>1052                                                       | 7 | $4.3 \cdot 10^{-9}$  | 848.41  | 896.57  |
| Etamycin_A_2-(N-Methyl-L-leucine)_analogue       | <i>Streptomyces</i> sp.                            | Bacteria               | Antibacterial               | 34  | 1057,<br>1069,<br>1050,<br>1052                                     | 7 | $4.6 \cdot 10^{-9}$  | 858.49  | 806.50  |
| Xentrivalpeptide B                               | <i>Xenorhabdus</i> sp.                             | Bacteria               |                             | 26  | 1050,                                                               | 7 | $4.7 \cdot 10^{-9}$  | 783.45  | 810.47  |

|                                                                     |                                |                         |               |     |                                          |   |                     |        |        |
|---------------------------------------------------------------------|--------------------------------|-------------------------|---------------|-----|------------------------------------------|---|---------------------|--------|--------|
|                                                                     |                                |                         |               |     | 1069,<br>1057                            |   |                     |        |        |
| Daitocidin B2                                                       | <i>Bacillus pumilus</i>        | Bacteria                | Antibacterial | 35- | 1050,<br>1069,<br>1057                   | 7 | $5.9 \cdot 10^{-9}$ | 895.53 | 893.53 |
| Dolastatin I                                                        | <i>Dolabella auricularia</i>   | Mollusca<br>(Sea hare)  | Cytotoxic     | 36  | 1092                                     | 7 | $6.3 \cdot 10^{-9}$ | 516.22 | 577.24 |
| Tunicyclin D                                                        | <i>Psammosilene tunicoides</i> | Plant                   | Antifungal    | 37  | 1052,<br>1050,<br>1069,<br>1057          | 7 | $7.0 \cdot 10^{-9}$ | 900.46 | 823.50 |
| Hymenamide F                                                        | <i>Hymeniacidon</i> sp.        | Porifera                |               | 38  | 1057,<br>1069,<br>1050,<br>1052,<br>1070 | 7 | $8.8 \cdot 10^{-9}$ | 764.44 | 768.47 |
| Aerucyclamide C                                                     | <i>Microcystis aeruginosa</i>  | Cyanobacteria           |               | 39  | 1092                                     | 7 | $9.5 \cdot 10^{-9}$ | 516.22 | 645.28 |
| [D-Asp3,(E)-Dhb7]Microcystin LR_<br>[D-Asp3,(E)-Dhb7]Microcystin LR | <i>Microcystis bloom</i>       | Cyanobacteria           | Cytotoxic     | 40  | 1092                                     | 7 | $1.5 \cdot 10^{-8}$ | 980.53 | 846.91 |
| Pitipeptolide A                                                     | <i>Lyngbya majuscula</i>       | Cyanobacteria           |               | 41  | 1057,<br>1069,<br>1050                   | 7 | $1.6 \cdot 10^{-8}$ | 807.48 | 795.51 |
| Microcystin RA                                                      | <i>Microcystis</i>             | Cyanobacteria           |               | 40  | 1092                                     | 7 | $1.7 \cdot 10^{-8}$ | 952.50 | 825.38 |
| Prepatellamide A                                                    | <i>Lissoclinum patella</i>     | Chordata,<br>(Ascidian) |               | 42  | 1052,<br>1056,<br>1064,<br>1051,<br>1050 | 7 | $2.7 \cdot 10^{-8}$ | 760.34 | 657.29 |
| Cyclonellin                                                         | <i>Axinella carteri</i>        | Porifera                |               | 43  | 1080,<br>1069,<br>1072,<br>1074,         | 6 | $1.8 \cdot 10^{-8}$ | 962.46 | 960.59 |

|                                   |                                            |                              |                                    |    |                        |   |                     |        |        |
|-----------------------------------|--------------------------------------------|------------------------------|------------------------------------|----|------------------------|---|---------------------|--------|--------|
|                                   |                                            |                              |                                    |    | 1051,<br>1070,<br>1092 |   |                     |        |        |
| Lissoclinamide 9                  | <i>Lissoclinum patella</i>                 | Ascidian                     | Cytotox                            | 27 | 1056,<br>1057          | 6 | $2.1 \cdot 10^{-8}$ | 707.29 | 593.29 |
| Kailuin D                         | A marine-derived<br>bacterium              | Marine<br>bacteria           | Cytotox                            | 44 | 1071,                  | 6 | $4.9 \cdot 10^{-8}$ | 751.51 | 804.52 |
| Raocyclamide B                    | <i>Oscillatoria raoi</i>                   | Cyanobacteria                |                                    | 45 | 1056,<br>1057          | 6 | $6.5 \cdot 10^{-8}$ | 568.21 | 581.17 |
| Viomycin,_BAN,_INN_4'-<br>Hydroxy | <i>Streptomyces</i>                        | Bacteria                     | Antibacterial,<br>Antituberculosis | 46 | 1050,<br>1051          | 6 | $6.8 \cdot 10^{-8}$ | 701.32 | 602.26 |
| Sclerotide A                      | <i>Aspergillus<br/>sclerotiorum PT06-1</i> | Marine-<br>Derived<br>Fungus | Antifungal                         | 47 | 1052,                  | 6 | $7.3 \cdot 10^{-8}$ | 709.29 | 705.31 |

\* : Code strain : for all strains, read PMC XXXX.18 except for PMC 1092.19

## References

- Schmidt, G.; Grube, A. Styliissamides A-D, new proline-containing cyclic fleptapeptides from the marine sponge *Stylissa caribica*. *Eur. J. Org. Chem.* **2007**, 4103-4110.
- Dalisay, D.S.; Rogers, E.W.; Edison, A.S.; Molinski, T.F. Structure Elucidation at the Nanomole Scale. 1. Trisoxazole Macrolides and Thiazole-Containing Cyclic Peptides from the Nudibranch *Hexabranchus sanguineus*. *J. Nat. Prod.* **2009**, 72, 732-738.
- Pesic, A.; Baumann, H.I.; Kleinschmidt, K.; Ensle, P.; Wiese, J. Champacyclin, a New Cyclic Octapeptide from *Streptomyces* Strain C42 Isolated from the Baltic Sea. *Mar. Drugs* **2013**, 11, 4834-4857.
- Wenzel, M.; Rautenbach, M.; Vosloo, J.A.; Siersma, T.; Aisenbrey, C.H.M.; Ek.Zaitseva, E.; Laubscher, W.E.; van Rensburg, W.; Behrends, J.C.; Bechinger, B.; Hamoen L.W. The Multifaceted Antibacterial Mechanisms of the Pioneering Peptide Antibiotics Tyrocidine and Gramicidin S. *mBio.* **2018**, 9(5) 802-818.
- Boudreau, P.D.; Byrum, T.; Liu, W.T.; Dorrestein, P.C.; Gerwick, W.H. Viequeamide A, a Cytotoxic Member of the Kulolide Superfamily of Cyclic Depsipeptides from a Marine Button Cyanobacterium. *J. Nat. Prod.* **2012**, 75, 1560-1570.
- Williams, D.E.; Patrick, B O.; Behrisch, H.W. Dominicin, a cyclic octapeptide, and laughine, a bromopyrrole alkaloid, isolated from the Caribbean marine sponge *Eurypon laughlini*. *J. Nat. Prod.* **2005**, 68, 327-330.
- Han, B.N.; Gross, H.; McPhail, K.L.; Goeger, D.; Maier, C.S.; Gerwick, W.H. Wewakamide A and Guineamide G, Cyclic Depsipeptides from the Marine Cyanobacteria *Lyngbya semiplena* and *Lyngbya majuscula*. *J. Microbiol. Biotechnol.* **2011**, 21, 930-936.
- Nogle, L.M.; Marquez, B.L.; Gerwick, W.H. Wewakazole, a novel cyclic dodecapeptide from a Papua New Guinea *Lyngbya majuscula*. *Org. Lett.* **2003**, 5, 3-6.

9. Fujii, K.; Sivonen, K.; Kashiwagi, T.; Hirayama, K.; Harada, K. Nostophycin, a Novel Cyclic Peptide from the Toxic Cyanobacterium *Nostoc* sp. 152. *J. Org. Chem.* **1999**, *64*, 16, 5777-5782.
10. Pettit, G.R.; Tan, R.; Williams, M.D.; Tackett, L.; Schmidt, J.M.; Cerny, R.L.; Hooper, J.N.A. Isolation and structure of phakellistatin 2 from the Eastern Indian Ocean marine sponge *Phakellia carteri*. *Bioorg. Med. Chem. Lett.* **1993**, *3*, 2869-2874.
11. Williams, D.E.; Yu, K.; Behrisch, H.W. Rolloamides A and B, Cytotoxic Cyclic Heptapeptides Isolated from the Caribbean Marine Sponge *Eurypon laughlini*. *J. Nat. Prod.* **2009**, *72*, 1253-1257.
12. Carter, D.C.; Moore, R.E.; Mynderse, J.S.; Niemczura, W.P.; Todd J.S. Structure of Majusculamide C ; a cyclic depsipeptide from *Lyngbya majuscula*. *J. Org. Chem.* **1984**, *49*, 236-241.
13. Ibrahim, S.R.M.; Min, C.C.; Teuscher, F.; Ebel, R.; Kakoschke, C.; Lin, W.H.; Wray, V.; Edrada-Ebel, R.; Proksch, P. Callyaerins A-F and H, new cytotoxic cyclic peptides from the Indonesian marine sponge *Callyspongia aerizusa*. *Bioorg. Med. Chem.* **2010**, *18*, 4947-4956.
14. Kobayashi, J.; Tsuda, M.; Nakamura, T.; Mikami, Y.; Shigemori, H. Hymenamides A and B, new proline-rich cyclic heptapeptides from the Okinawan marine sponge *Hymeniacidon* sp. *Tetrahedron* **1993**, *49*, 2391-2402.
15. Guan, L. L.; Sera, Y.; Adachi, K.; Nishida, F.; Shizuri, Y. Isolation and evaluation of nonsiderophore cyclic peptides from marine sponges. *Biochem. Biophys. Res. Commun.* **2001**, *283*, 976-981.
16. Konishi, M.; Sugawara, K.; Hanada, M.; Tomita, K.; Tomatsu, K.; Miyaki, T.; Kawaguchi, H.; Buck, R.E.; More, C.; Rossomano, V.Z. Empedopeptin (BMV-28117), a new depsipeptide antibiotic. I. Production, isolation and properties. *J. Antibiot (Tokyo)* **1984**, *37*(9), 949-957.
17. Fewer, D.P.; Jokela, J.; Wahlsten, M.; Rouhiainen, L.; Sivonen, K. Highly Diverse Cyanobactins in Strains of the Genus *Anabaena*. *Appl. Environ. Microbiol.* **2010**, *76*(3), 701-709.
18. Yamaki, H.; Sitachitta, N.; Sano, T.; Kaya, K. Two New Chymotrypsin Inhibitors Isolated from the Cyanobacterium *Microcystis aeruginosa* NIES-88. *J. Nat. Prod.* **2005**, *68*, 1, 14-18.
19. Lira, S.P.; Vita-Marques, A.M.; Seleghim, M.H.R.; Bugni, T.S.; LaBarbera, D.V.; Sette, L.D.; Sponchiado, S.R.P. New destruxins from the marine-derived fungus *Beauveria felina*. *J. Antibiot.* **2006**, *59*, 553-563.
20. Wieczorek, Z.; Siemion, I.Z.; Zimecki, M.; Bolewska-Pedyczak, E.; Wieland, T. Immunosuppressive Activity in the Series of Cycloamanide Peptides from Mushrooms. *Peptides* **1993**, *14*, 1-5.
21. Erickson, K.L.; Gustafson, K.R.; Milanowski, D.J.; Pannell, L.K.; Klose, J.R.; Boyd, M.R. Myriastramides A-C, new modified cyclic peptides from the Philippines marine sponge *Myriastra clavosa*. *Tetrahedron* **2003**, *59*, 10231-10238.
22. Takesako, K.; Ikai, K.; Haruna, F.; Endo, M.; Shimanaka, K.; Sono, E.; Nakamura, T.; Kato, I.; Yamaguchi, H. Aureobasidins, new antifungal antibiotics. Taxonomy, fermentation, isolation, and properties. *J. Antibiot* **1991**, *44*(9), 919-924.
23. Schmidt, E.W.; Harper, M.K.; Faulkner, D.J. Mozamides A and B, Cyclic Peptides from a *Theonellid* Sponge from Mozambique. *J. Nat. Prod.* **1997**, *60*, 8, 779-782.
24. Cychon, C.; Kock, M. Stylissamides E and F, Cyclic Heptapeptides from the Caribbean Sponge *Stylissa caribica*. *J. Nat. Prod.* **2010**, *73*, 738-742.
25. Tan, L.T.; Williamson, R.T.; Gerwick, W.H.; Watts, K.S.; McGough, K.; Jacob, R. Cis,cis- & trans,trans-ceratospongamide, new bioactive cyclic heptapeptides from the Indonesian red alga *Ceratodictyon spongiosum* & symbiotic sponge *Sigmatocia*. *J. Org. Chem.* **2000**, *65*, 419-425.

26. Zhou, Q.; Dowling, A.; Heide, H.; Wöhnert, J.; Brandt, U.; Baum, J.; Constant, R.; Bode, H.B. Xentrivalpeptides A–Q: Depsipeptide Diversification in *Xenorhabdus*. *J. Nat. Prod.* **2012**, *75*, 10, 1717-1722.
27. Morris, L.A. ; Van den Bosch, J.J.K.; Versluis, K.; Thompson, G.S.; Jaspars, M. Structure determination and MSn analysis of two new lissoclinamides isolated from the Indo-Pacific ascidian *Lissoclinum patella*. *Tetrahedron* **2000**, *56*, 42, 8345-8353.
28. Kimura J.; Takada, Y.; Inayoshi, T.; Nakao, Y.; Goetz, G.; Yoshida, W.Y.; Scheuer, P.J. Kulokekahlide-1, a cytotoxic depsipeptide from the cephalaspidean mollusc *Philineopsis speciosa*. *J. Org. Chem.* **2002**, *67*, 1760-1767.
29. Noriyasu, I.; Shahedur, R.M.; Takashi, A. Production of iturin A homologues under different culture conditions. *Journal of Environmental Sciences Supplement* **2009**, S28–S32.
30. Guan, L.L.; Sera, Y.; Kadachi, K.; Nishida, F.; Shizuri, Y. Isolation and Evaluation of Nonsiderophore Cyclic Peptides from Marine Sponges. *Biochemical and Biophysical Research Communications*, **2001**, 283 (4), 976-981.
31. Morita, H.; Takeya, K. Bioactive Cyclic Peptides from Higher Plants. *Heterocycles, Review* **2010**, *80* No. 2, 739-764.
32. Chen, C.H.; Lang, G.; Mitova, M.I.; Murphy, A.C.; Cole, A.L.; Din, L.B.; Blunt, J.W.; Munro, M.H. Pteratides I-IV, new cytotoxic cyclodepsipeptides from the Malaysian basidiomycete *Pterula* sp. *J Org Chem.* **2006**, *71*(21), 7947-7951.
33. Herrmann, J.; Abou Fayad, A.; Müller, R. Natural products from myxobacteria: novel metabolites and bioactivities. *Nat. Prod. Rep.* **2017**, *34*, 135-160.
34. Sun, P.; Maloney, K.N.; Nam, S.J.; Haste, N.M.; Raju, R.; Aalbersberg, W.; Jensen, P.R.; Nizet, V.; Hensler, M.E.; Fenical, W. Fijimycins A-C, three antibacterial etamycin-class depsipeptides from a marine-derived *Streptomyces* sp. *Bioorg. Med. Chem.* **2011**, *19*, 6557-6562.
35. Atta-ur-Rahman *Studies in Natural Products Chemistry*, Elsevier Science, **2000**, p.89.
36. Sone, H.; Kigoshi, H.; Yamada, K. Isolation and stereostructure of dolastatin I, a cytotoxic cyclic hexapeptide from the Japanese sea hare *Dolabella auricularia*. *Tetrahedron* **1997**, *53*, 8149-8154.
37. Tian, J.; Shen, Y.; Yang, X.; Liang, S.; Shan, L.; Li, H.; Liu, R.; Zhang, W. Antifungal cyclic peptides from *Psammosilene tunicoides*. *J Nat Prod.* **2010**, *73*(12), 1987-1992.
38. Tsuda, M.; Shigemori, H.; Kobayashi, J. Hymenamides A - K, new cyclic peptides from a marine sponge *Hymeniacidon* sp. *Pept. Chem.* **1996**, *33*, 161-164.
39. Portmann, C.; Blom, J. F.; Kaiser, M.; Brun, R.; Jüttner, F.; Gademann, K. Isolation of Aerucyclamides C and D and Structure Revision of Microcyclamide 7806A : Heterocyclic Ribosomal Peptides from *Microcystis aeruginosa* PCC 7806 and their Antiparasite Evaluation. *J. Nat. Prod.* **2008**, *71*, 1891–1896.
40. Matthiensen, A.; Beattie, K.A.; Yunes, J. S.; Kaya, K.; Codd, G.A. [D-Leu1]microcystin-LR, from the cyanobacterium *Microcystis* RST 9501 and from a *Microcystis* bloom in the Patos lagoon estuary, Brazil, *Phytochemistry* **2000**, *55*, 383-387.
41. Luesch, H.; Pangilinan, R.; Yoshida, W.Y.; Moore, R.E.; Paul, V.J. Pitipeptolides A and B, new cyclodepsipeptides from the marine cyanobacterium *Lyngbya majuscula*. *J. Nat. Prod.* **2001**, *64*, 304-307.
42. Fu, X.; Su, J.; Zeng, L. Prepatellamide A, a new cyclic peptide from the ascidian *Lissoclinum patella*. *Science in China Ser. B* **2000**, *43*, 643-648.
43. Milanowski, D.J.; Rashid, M.A.; Gustafson, K.R. Cyclonellin, a new cyclic octapeptide from the marine sponge *Axinella carteri*. *J. Nat. Prod.* **2004**, *67*, 441-444.
44. Harrigan, G.G.; Harrigan, B.L.; Davidson, B.S. Kailuins A-D, new cyclic acyldepsipeptides from cultures of a marine-derived bacterium. *Tetrahedron* **1997**, *53*, 1577-1582.



45. Admi, V.; Afek, U.; Carmeli, S. Raocyclamides A and B, novel cyclic hexapeptides isolated from the cyanobacterium *Oscillatoria raoi*. *J. Nat. Prod.* **1996**, *59*, 396-399.
46. Bycroft, B.W.; Payne, D.J. *Dictionary of Antibiotics and Related Substances*, **2013**, Page 1797.
47. Zheng, J.; Zhu, H.; Hong, K.; Wang, Y.; Liu, P.; Wang, X.; Peng, X.; Zhu, W. Novel Cyclic Hexapeptides from Marine-Derived Fungus, *Aspergillus sclerotiorum* PT06-1. *Org. Lett.* **2009**, *11*, 5262-5265.
